# Supplementary material for: Minimal genetic change in Vibrio cholerae in Mozambique over time: Multilocus variable number tandem repeat analysis and whole genome sequencing
Source: PLoS Negl Trop Dis. 2017 Jun 16;11(6):e0005671. doi: 10.1371/journal.pntd.0005671 (PMC5489214; doi:10.1371/journal.pntd.0005671)
Supplement: S2 Table — (XLSX) [file pntd.0005671.s002.xlsx]

## Sheet: Sheet1
Varaint_number	Site_position	Wave_3_backbone	Mutation	Gene	Function
1	46265	C	T	VC_0048	smf protein
2	247087	A	T	VC_0241	mannose-1-phosphate guanylyltransferase
3	263830	C	T	VC_0258	rfbT protein
4	402123	C	G	VC_r012	16S ribosomal RNA
5	402128	G	C	VC_r012	16S ribosomal RNA
6	402140	C	G	VC_r012	16S ribosomal RNA
7	402142	T	C	VC_r012	16S ribosomal RNA
8	402151	T	G	VC_r012	16S ribosomal RNA
9	402153	T	G	VC_r012	16S ribosomal RNA
10	402162	C	T	VC_r012	16S ribosomal RNA
11	402177	G	C	VC_r012	16S ribosomal RNA
12	402179	A	T	VC_r012	16S ribosomal RNA
13	447975	C	T	VC_0420	conserved hypothetical protein
14	532191	T	C	VC_5000	putative transposase
15	532205	C	G	VC_5000	putative transposase
16	532208	G	T	VC_5000	putative transposase
17	674883	C	T	VC_0633	outer membrane protein OmpU
18	739840	C	T	intergenic
19	946160	G	A	VC_0886	hypothetical protein
20	1324135	C	T	VC_1252	competence damage protein CinA, putative
21	1562797	A	G	rtxA	RTX toxin RtxA
22	1727784	C	T	intergenic
23	1896020	T	A	intergenic
24	1896021	G	T	intergenic
25	1920594	T	C	VC_1771	hypothetical protein
26	1948066	C	T	intergenic
27	2541506	C	T	VC_2376	glutamate synthase, large subunit
28	2935799	C	T	VC_r023	23S ribosomal RNA
29	2935831	C	A	VC_r023	23S ribosomal RNA
30	2935840	T	C	VC_r023	23S ribosomal RNA
31	2935856	G	C	VC_r023	23S ribosomal RNA
32	2959497	G	A	VC_2775	glucose inhibited division protein A
33	3016739	T	C	VC_A0047	conserved hypothetical protein
34	3093621	C	A	intergenic
35	3369388	A	G	VC_A0457	hypothetical protein
36	3485921	T	C	intergenic
37	3565127	G	A	VC_A0667	sodium/solute symporter
38	3571310	G	A	VC_A0675	nitrate/nitrite sensor protein NarQ
39	3842757	C	T	VC_0928	hypothetical protein

## Sheet: Sheet2
46265	46265
247087	247087
263830	263830
402127	402125
402132	402130
402144	402142
402146	402144
402155	402153
402157	402155
402166	402164
402181	402179
402183	402181
447979	447977
532195	532193
532209	532207
532212	532210
674887	674885
739844	739842
946166	946163
1324145	1324140
1562813	1562805
1727804	1727794
1896040	1896030
1896041	1896031
1920614	1920604
1948086	1948076
2541528	2541517
2935827	2935813
2935859	2935845
2935868	2935854
2935884	2935870
2959525	2959511
3016767	3016753
3093649	3093635
3369420	3369404
3485953	3485937
3565159	3565143
3571342	3571326
3842791	3842774
